# Supplementary material for: Extraordinary dual-ion electrochemical deionization capacity and energy efficiency enabled by coupling of Na3Fe2(PO4)3 and NiVAl layered double hydroxide electrodes
Source: Royal Society of Chemistry journal article supplement (doi:10.1039/d1ta06094e), 2021-01-01
Supplement: d1ta06094e1.pdf [file d1ta06094e1.pdf]

## Supporting information

Extraordinary dual-ion electrochemical deionization capacity and energy efficiency enabled by coupling of  $\text{Na}_3\text{Fe}_2(\text{PO}_4)_3$  and NiVAl layered double hydroxides electrodes

Pei Zhang<sup>1</sup>, Lei Yao<sup>2</sup>, Xiangzhong Ren<sup>1</sup>, Yongliang Li<sup>1</sup>, and Libo Deng\*<sup>1</sup>

<sup>1</sup>College of Chemistry and Environmental Engineering, Shenzhen University, Shenzhen 518060, China

<sup>2</sup>Shenzhen Key Laboratory of Special Functional Materials, Shenzhen Engineering Laboratory for Advanced Technology of Ceramics, Guangdong Research Center for Interfacial Engineering of Functional Materials, College of Materials Science and Engineering, Shenzhen University, Shenzhen 518060, P. R. China

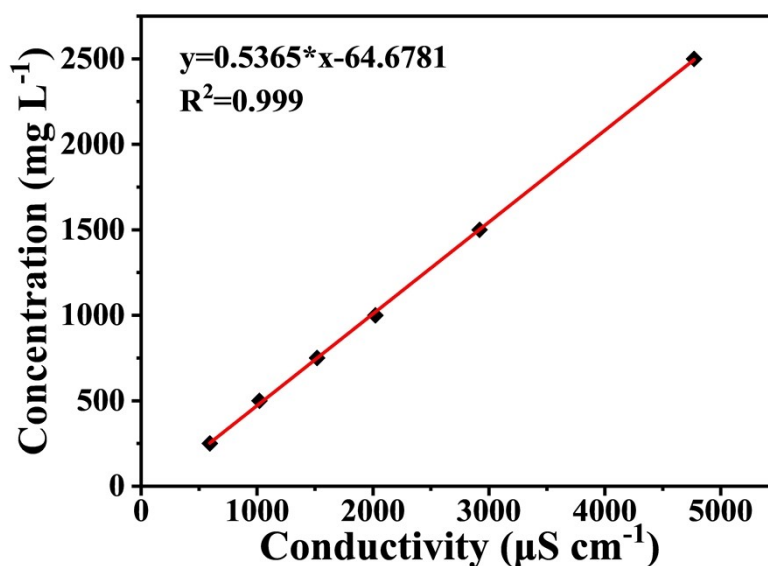

Fig. S1 The relationship between the conductivity and concentration of NaCl solution.

\* Corresponding author: Denglb@szu.edu.cn; Tel: +86-755-26536157

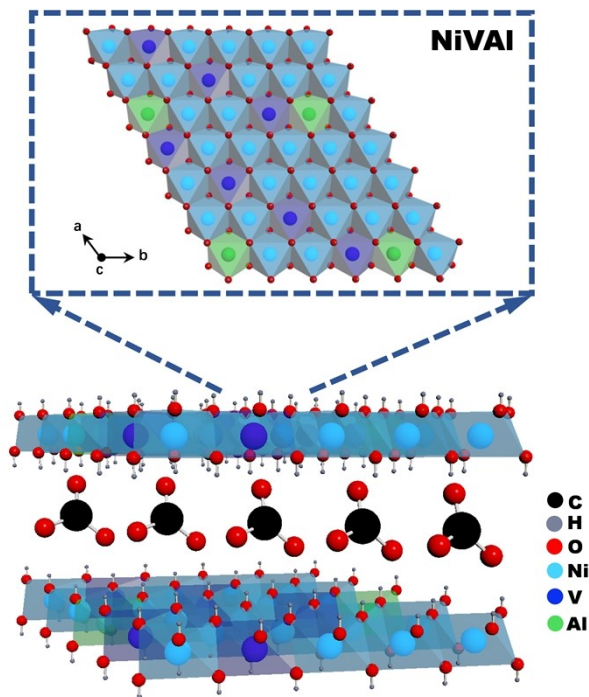

Fig. S2 Top-view and front view schematic diagram of NiVAI-LDH crystal with Cl<sup>-</sup> in the interlayer.

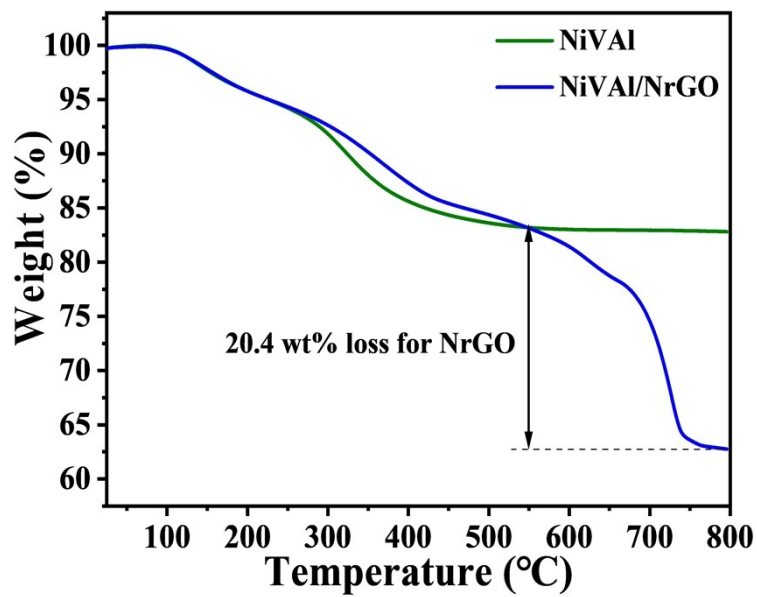

Fig. S3 TGA curves of NiVAI and NiVAI/NrGO.

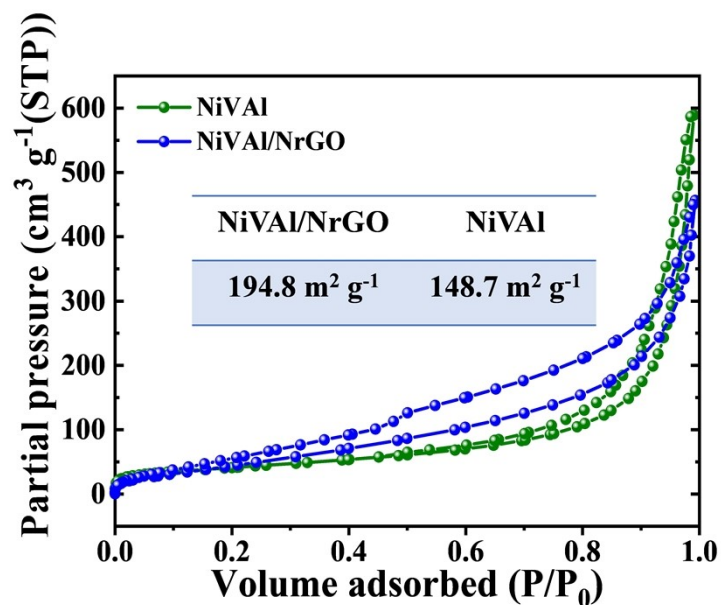

Fig. S4  $\text{N}_2$  adsorption–desorption isotherms and BET analysis of NiVAI and NiVAI/NrGO.

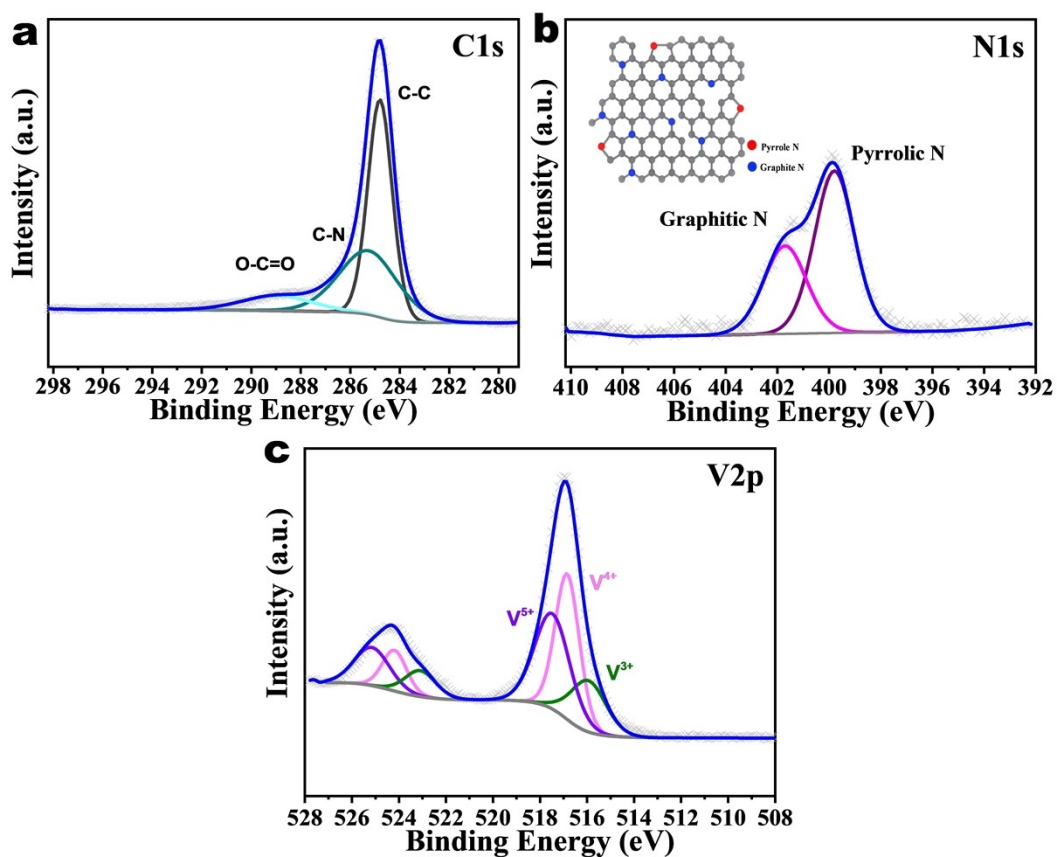

Fig. S5 High-resolution XPS spectra of: (a) C1s; (b) N1s; and (c) V2p in NiVAI/NrGO.

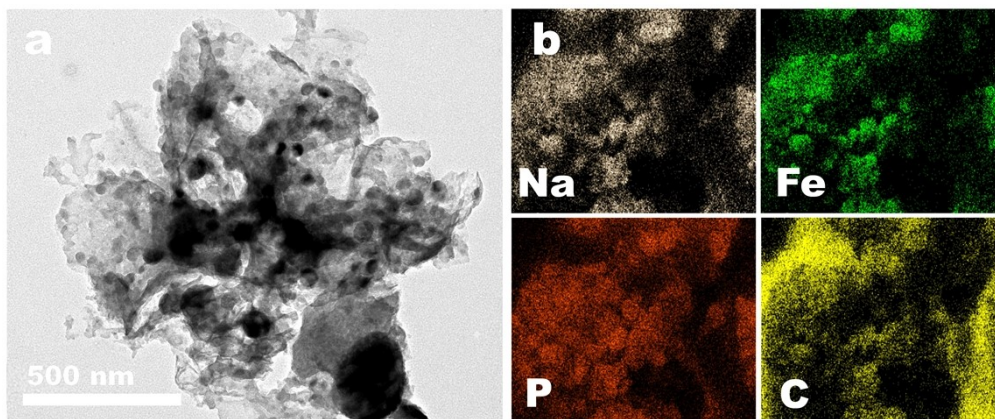

Fig. S6 (a) TEM image of NFP@C and (b) EDS elemental mapping.

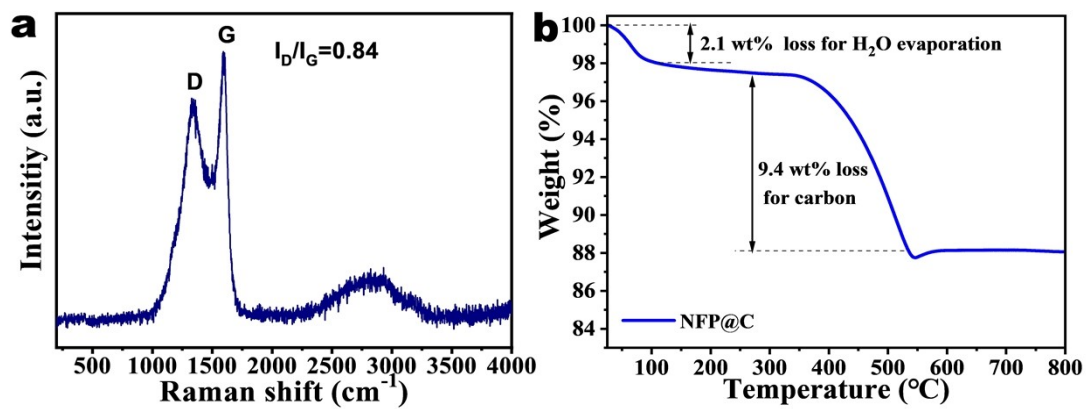

Fig. S7 (a) Raman spectrum and (b) TGA curve of NFP@C.

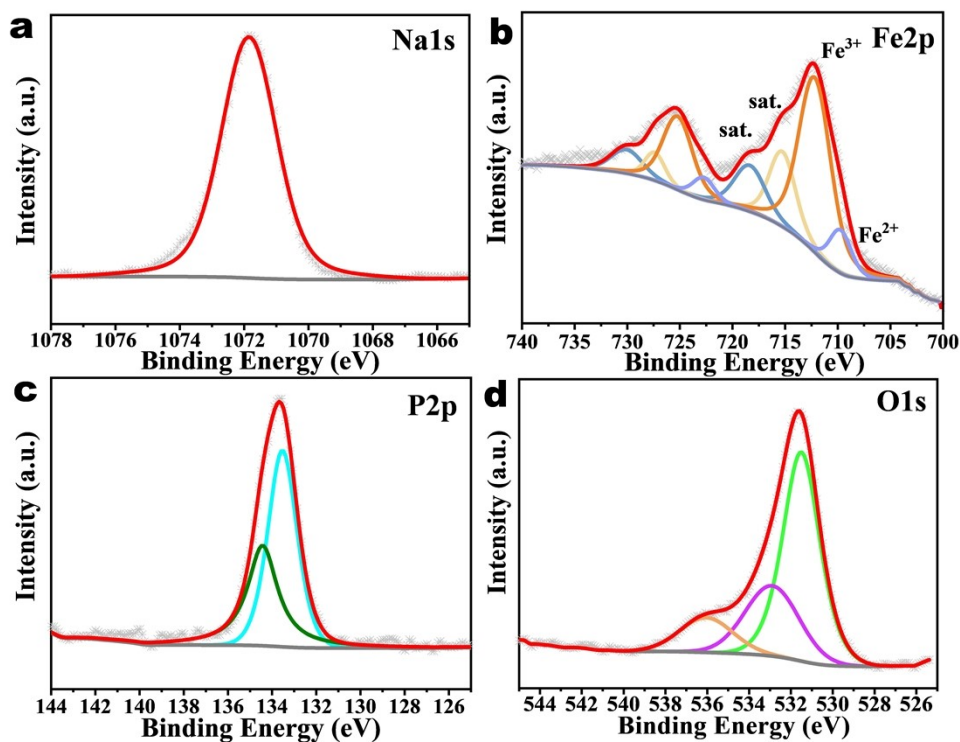

Fig. S8 XPS high-resolution spectra of the as-prepared NFP@C nanocomposite: (a) Na1s; (b) Fe2p; (c) P2p; and (d) O1s.

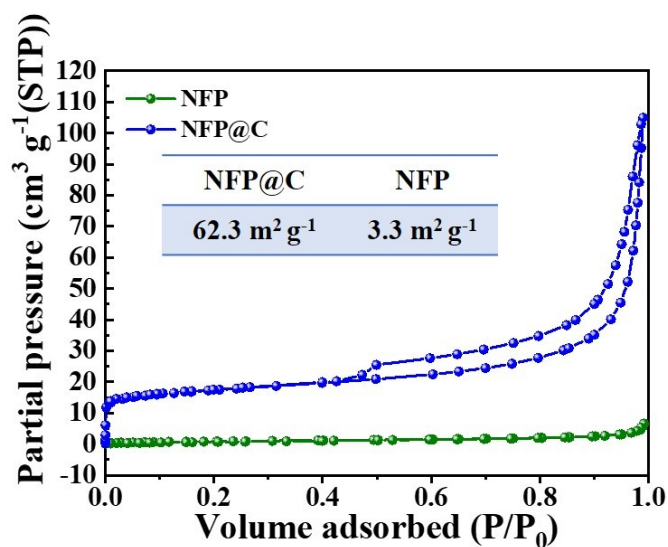

Fig. S9 N<sub>2</sub> adsorption–desorption isotherms and specific surface analysis of NFP@C and NFP.

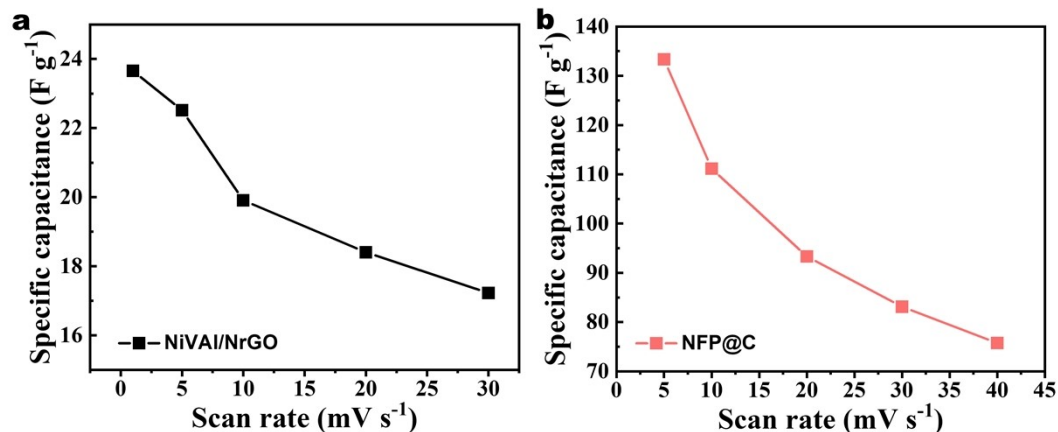

Fig. S10 Specific capacitances of: (a) NiVAI/NrGO and (b) NFP@C at different scan rates determined using a CV method.

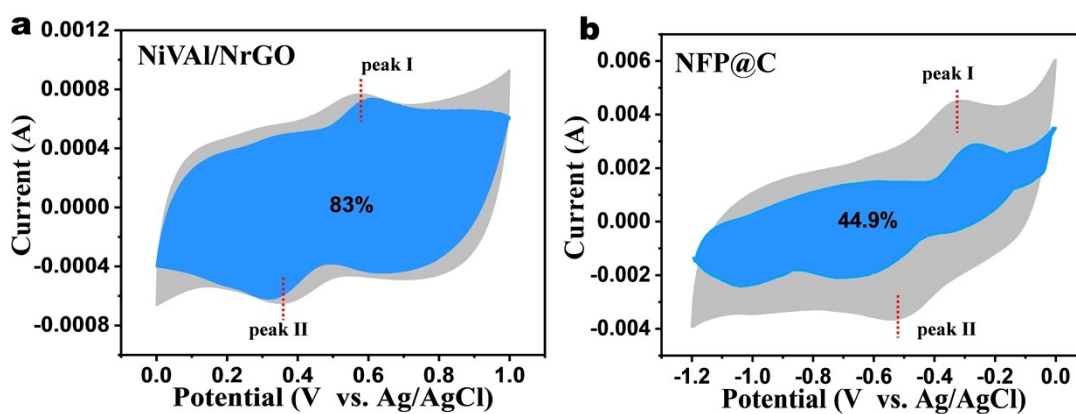

Fig. S11 CV curves showing the capacitive (blue area) and diffusion-controlled (grey area) contributions to intercalation process for: (a) NiVAI/NrGO and (b) NFP@C at a scan rate of  $20 \text{ mV s}^{-1}$ .

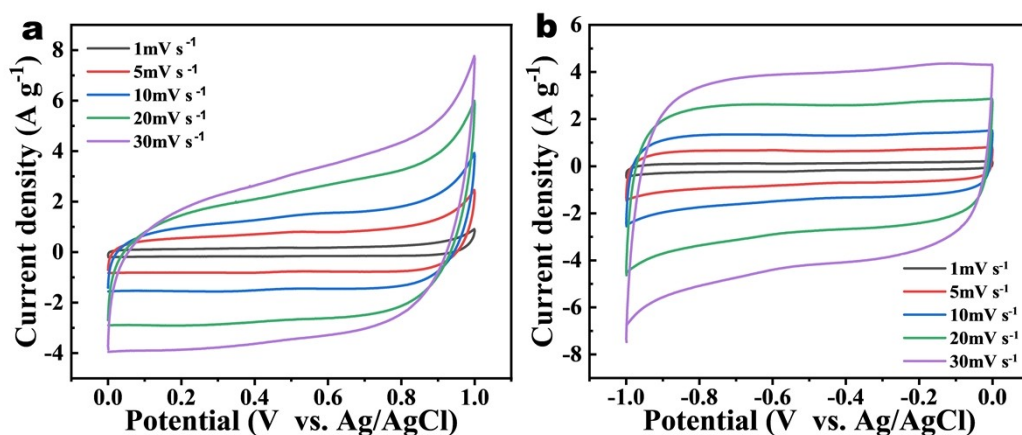

Fig. S12 CV curves of AC in different potential ranges. Electrolyte: 1 M NaCl.

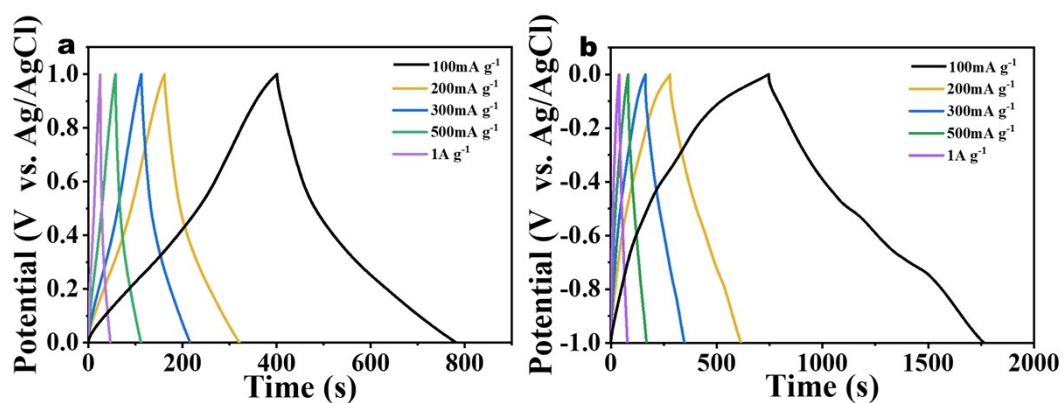

Fig. S13 GCD curves acquired in a three-electrode cell for: (a) NiVAI/NrGO and (b) NFP@C at different current densities. Electrolyte: 1 M NaCl.

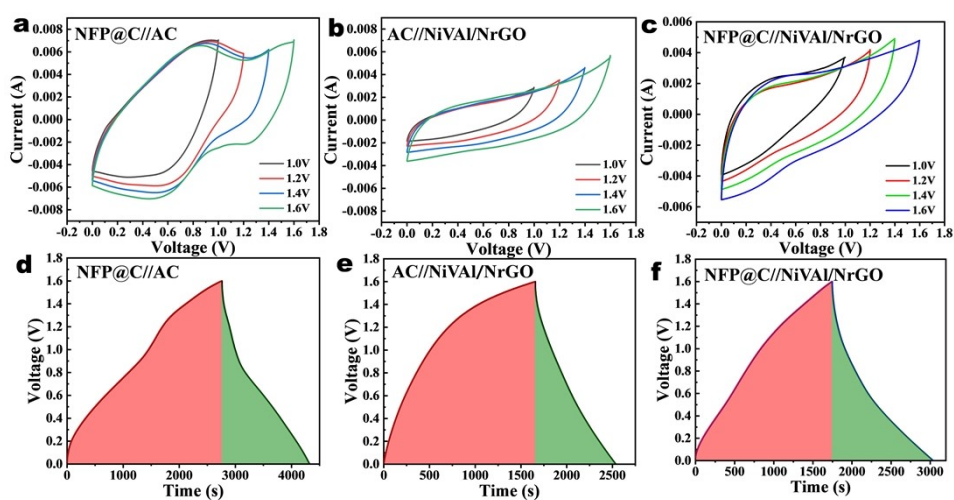

Fig. S14 (a-c) CV curves ( $5\text{mV s}^{-1}$ ) acquired in different voltage ranges for the three EDI systems and (d-f) GCD curves measured at a current density of  $50\text{ mA g}^{-1}$ . The red and green shaded areas indicate the energy consumed and recoverable during charge and discharge. Electrolyte:  $1000\text{ mg L}^{-1}$  NaCl.

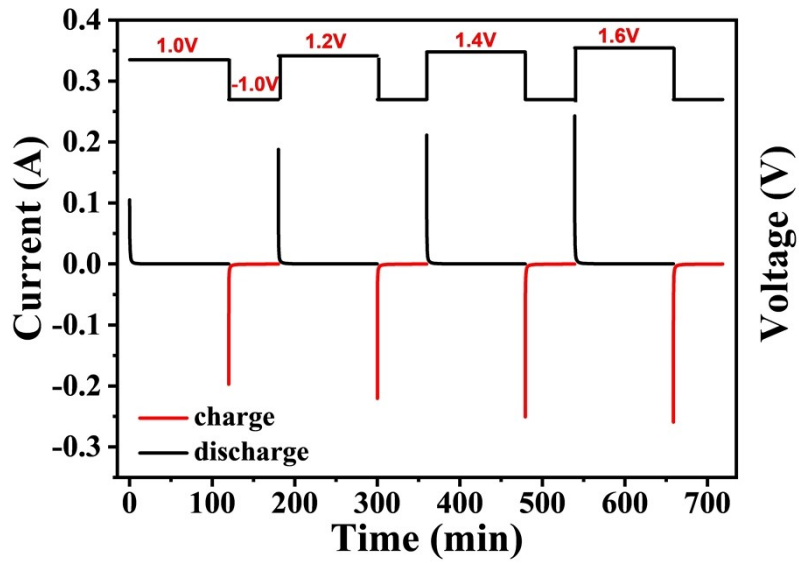

Fig. S15 Chronocoulometry curves of the DEDI system tested at different charging voltages. Electrolyte: 1000 mg L<sup>-1</sup> NaCl.

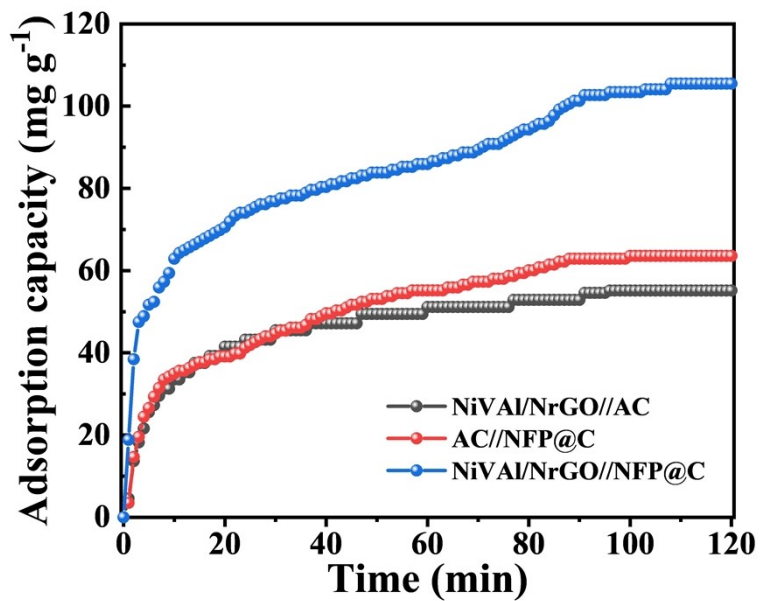

Fig. S16 Comparison of salt adsorption capacity of AC/NFP@C, NiVAI/NrGO//AC and NiVAI/NrGO//NFP@C systems. Electrolyte: 1000 mg L<sup>-1</sup> NaCl.



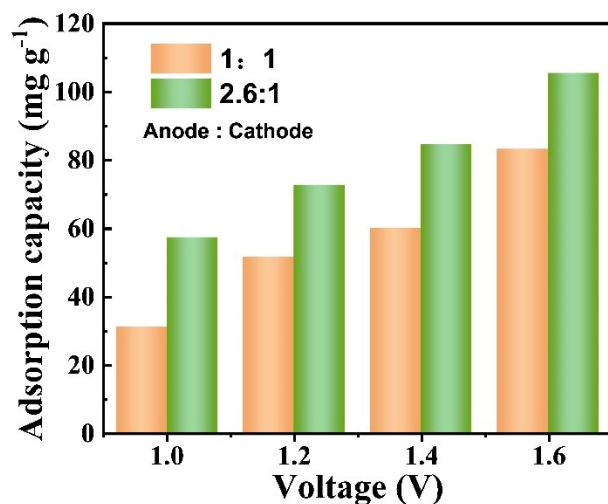

Fig. S17 Comparison of desalination performance of NiVAI/NrGO/NFP@C system constructed with different mass ratios.

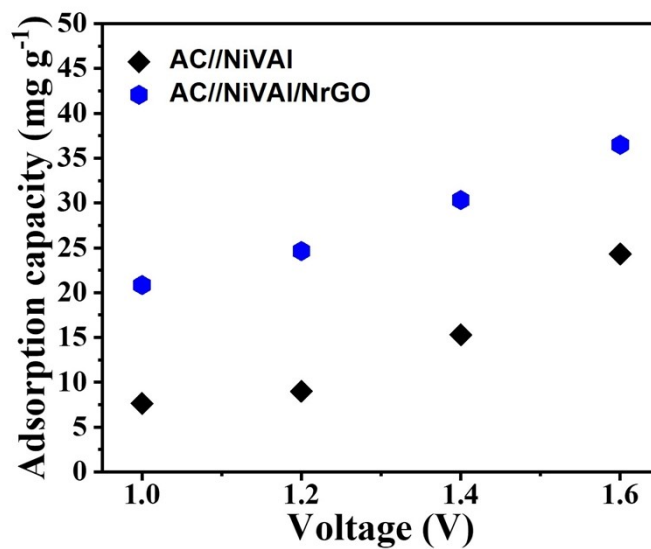

Fig. S18 Comparison of salt adsorption capacity for NiVAI//AC and NiVAI/NrGO//AC. Concentration of the salt: 250 mg L<sup>-1</sup>.

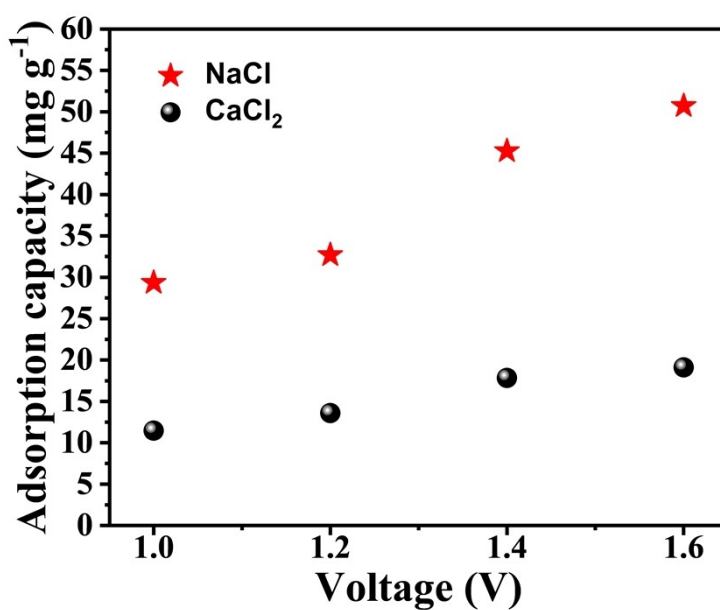

Fig. S19 Comparison of the adsorption capacity towards NaCl and CaCl<sub>2</sub> by the AC//NFP@C system. Concentration of the salts: 500 mg L<sup>-1</sup>.

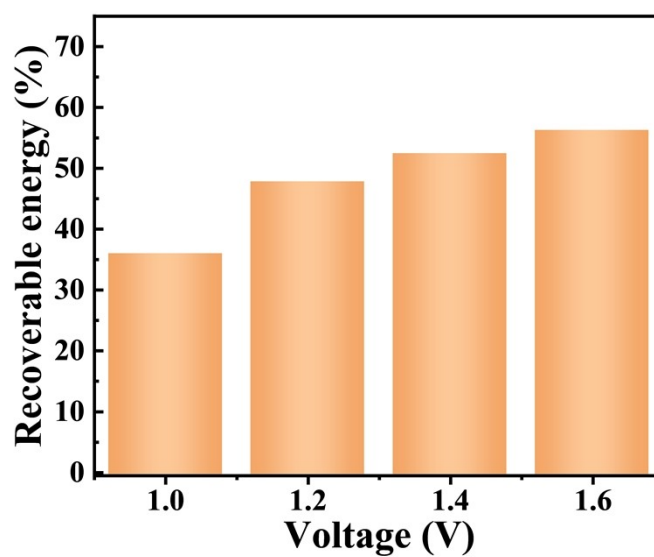

Fig. S20 The fraction of recoverable energy among the energy consumed for NiVAI/NrGO/NFP@C at various voltages. Electrolyte: 1000 mg L<sup>-1</sup> NaCl.

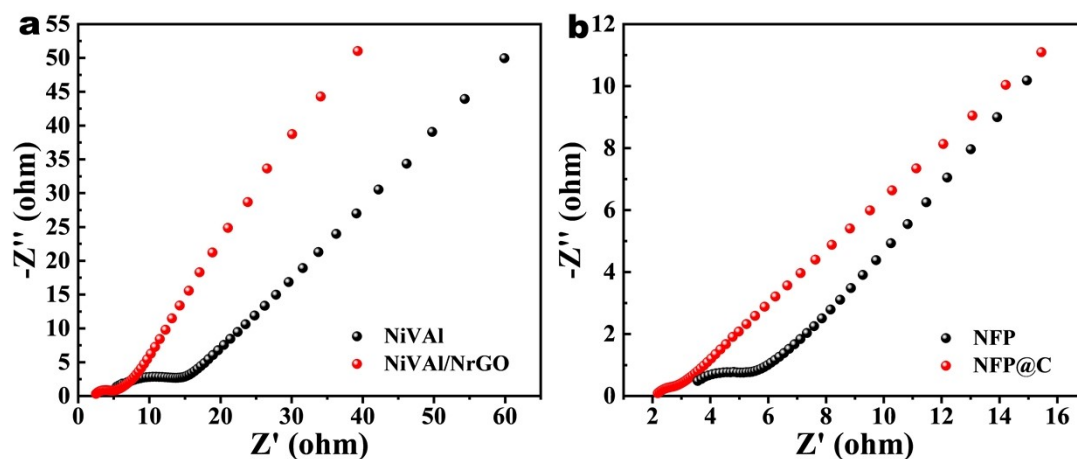

Fig. S21 Nyquist plots of the NiVAI, NiVAI/NrGO, NFP and NFP@C electrodes tested in a three-electrode system. Electrolyte: 1 M NaCl.

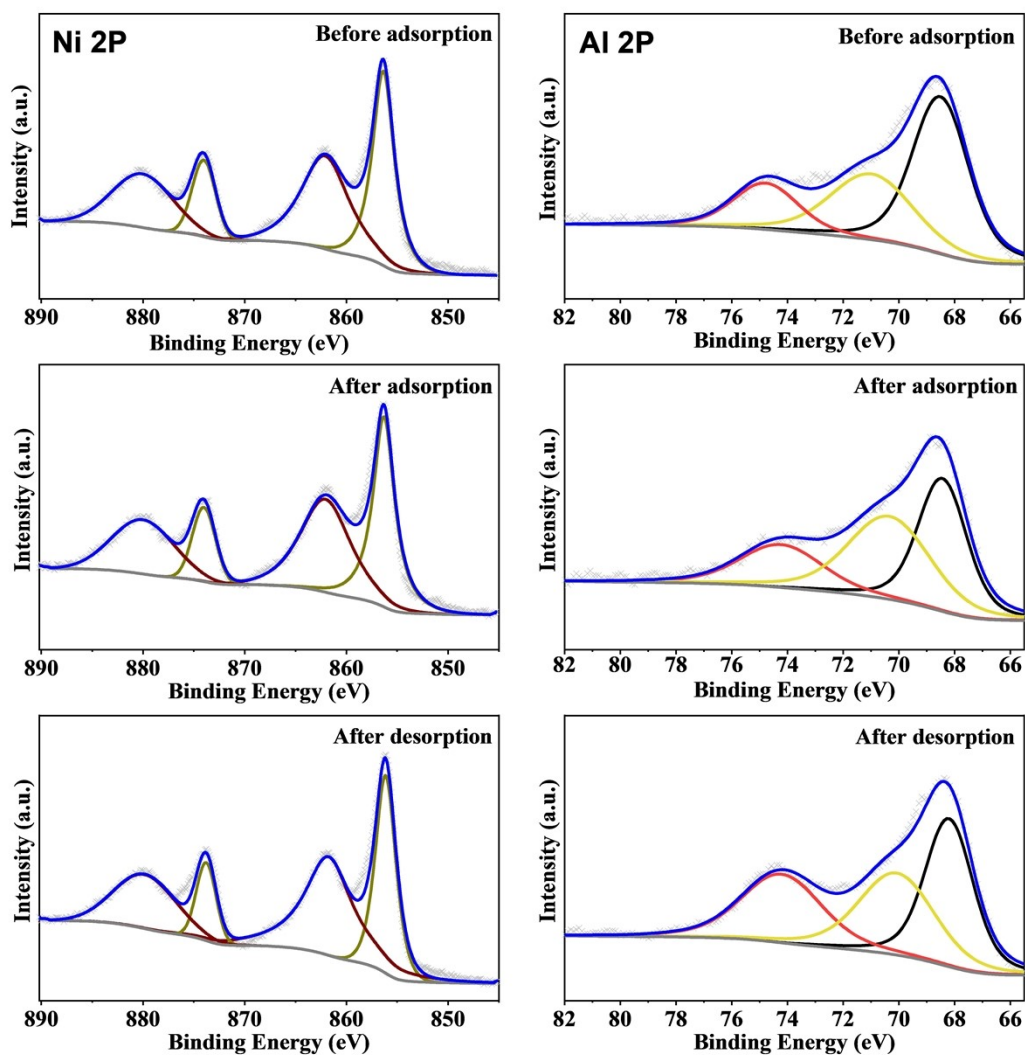

Fig. S22 XPS spectra of Ni2P and Al2P of NiVAI /NrGO at different states.

**Table S1.** Comparison between NFP@C//NiVAl/NrGO and other CDI applications.

| Cathode                                                | Anode                                             | Voltage<br>(V) | NaCl<br>Concentration<br>(mg L <sup>-1</sup> ) | Desalination<br>capacity<br>(mg g <sup>-1</sup> ) | Ref.         |
|--------------------------------------------------------|---------------------------------------------------|----------------|------------------------------------------------|---------------------------------------------------|--------------|
| VO <sub>x</sub> NT <sub>s</sub> /CNPT                  | AC                                                | 1.6            | 350.6                                          | 25                                                | 1            |
| Na <sub>2</sub> FeP <sub>2</sub> O <sub>7</sub>        | AC                                                | 1.2            | 5844                                           | 30.2                                              | 2            |
| MoS <sub>2</sub> /NOMC                                 | AC                                                | 1.6            | 250                                            | 28.82                                             | 3            |
| G-V <sub>2</sub> O <sub>5</sub>                        | G-V <sub>2</sub> O <sub>5</sub>                   | 1.2            | 584                                            | 12.5                                              | 4            |
| NaOH-Ti <sub>3</sub> C <sub>2</sub> T <sub>x</sub>     | AC                                                | 1.2            | 500                                            | 16.02                                             | 5            |
| Na <sub>x</sub> CoO <sub>2</sub>                       | AC                                                | 1.4            | 500                                            | 92.9                                              | 6            |
| FeHCF@3DNC                                             | AC                                                | 1.2            | 5844                                           | 60.5                                              | 7            |
| TiO <sub>2</sub> @COF-2                                | AC                                                | 1.6            | 200                                            | 33.66                                             | 8            |
| Na <sub>3</sub> MnTi(PO <sub>4</sub> ) <sub>3</sub> /C | AC                                                | 1.2            | 2000                                           | 72.2                                              | 9            |
| Ti <sub>3</sub> C <sub>2</sub> MXene                   | AC                                                | 1.2            | 500                                            | 26.8                                              | 10           |
| MnO <sub>2</sub>                                       | Ppy/AC                                            | 1.4            | 820                                            | 52.9                                              | 11           |
| PVDF                                                   | CS +3GA                                           | 1.2            | 1000                                           | 16.7                                              | 12           |
| Na <sub>1.1</sub> V <sub>3</sub> O <sub>7.9</sub> @rGO | Ag@rGO                                            | 1.4            | 2000                                           | 82.2                                              | 13           |
| CLF@Ti <sub>3</sub> C <sub>2</sub> T <sub>x</sub>      | CLF@Ti <sub>3</sub> C <sub>2</sub> T <sub>x</sub> | 1.2            | 600                                            | 34                                                | 14           |
| NFP@C                                                  | NiVAl/NrGO                                        | 1.6            | 1000                                           | 105.5                                             | this<br>work |

## Supplementary references

1. D.M. Sayed, M.S. El-Deab, N.K. Allam, Multi-walled vanadium oxide nanotubes modified 3D microporous bioderived carbon as novel electrodes for hybrid capacitive deionization, *Sep. Purif. Technol.* 2021, 266, 118597.
2. S. Kim, J. Lee, C. Kim, J. Yoon,  $\text{Na}_2\text{FeP}_2\text{O}_7$  as a Novel material for hybrid capacitive deionization, *Electrochim. Acta.* 2016, 203, 265-271.
3. S. Tian, X. Zhang, Z. Zhang, Novel  $\text{MoS}_2/\text{NOMC}$  electrodes with enhanced capacitive deionization performances, *Chem. Eng. J.* 2021, 409, 128200.
4. A. Baburaj, A.B. Puthirath, A. Jain, D. Palanisamy, D. Salpekar, J. Balachandran, M.A. Kabbani, F.C.R. Hernandez, G. Hughes, G. Babu, P.M. Ajayan, Multilayer graphene coated vanadium(V) oxide as electrodes for intercalation based brackish water desalination, *2D Mater.* 2020, 7, 45025.
5. B. Chen, A. Feng, R. Deng, K. Liu, Y. Yu, L. Song, MXene as a cation-selective cathode material for asymmetric capacitive deionization, *ACS Appl. Mater. Inter.* 2020, 12, 13750-13758.
6. R. Zhou, J. Li, W. Wei, X. Li, M. Luo, Atomic substituents effect on boosting desalination performances of Zn-doped  $\text{Na}_x\text{CoO}_2$ , *Desalination* 2020, 496, 114695.
7. A. Gong, Y. Zhao, M. He, B. Liang, K. Li, High-performance desalination of three-dimensional nitrogen-doped carbon framework reinforced Prussian blue in capacitive deionization, *Desalination* 2021, 505, 114997.
8. X. Liu, S. Zhang, G. Feng, Z. Wu, D. Wang, M.D. Albaqami, B. Zhong, Y. Chen, X. Guo, X. Xu, Y. Yamauchi, Core-shell MOF@COF motif hybridization: selectively functionalized precursors for titanium dioxide nanoparticle-embedded nitrogen-rich carbon architectures with superior capacitive deionization performance, *Chem. Mater.* 2021, 33, 1657-1666.
9. S. Wang, G. Wang, C. He, N. Gao, B. Lu, L. Zhao, J. Weng, S. Zeng, C. Li, Enabling superior hybrid capacitive deionization performance in NASICON-structured  $\text{Na}_3\text{MnTi}(\text{PO}_4)_3/\text{C}$  by incorporating a two-species redox reaction, *J. Mater. Chem. A* 2021, 9, 6898-6904.
10. L. Guo, X. Wang, Z.Y. Leong, R. Mo, L. Sun, H.Y. Yang, Ar plasma modification of 2D MXene  $\text{Ti}_3\text{C}_2\text{T}_x$  nanosheets for efficient capacitive desalination, *FlatChem.* 2018, 8, 17-24.
11. G. Tan, S. Lu, N. Xu, D. Gao, X. Zhu, Pseudocapacitive behaviors of polypyrrole grafted activated carbon and  $\text{MnO}_2$  electrodes to enable fast and efficient membrane-free capacitive deionization,

Environ. Sci. Technol. 2020, 54, 5843-5852.

12. J. Weng, S. Wang, G. Wang, P. Zhang, B. Lu, H. Wang, J. Jiang, C. Li, Carbon electrode with cross-linked and charged chitosan binder for enhanced capacitive deionization performance, *Desalination*, 2021, 505, 114979.
13. Z. Yue, Y. Ma, J. Zhang, H. Li, Pseudo-capacitive behavior induced dual-ion hybrid deionization system based on Ag@rGO || Na<sub>1.1</sub>V<sub>3</sub>O<sub>7.9</sub>@rGO, *J. Mater. Chem. A* 2019, 7, 16892-16901.
14. S. Anwer, D.H. Anjum, S. Luo, Y. Abbas, B. Li, S. Iqbal, K. Liao, 2D Ti<sub>3</sub>C<sub>2</sub>T<sub>x</sub> MXene nanosheets coated cellulose fibers based 3D nanostructures for efficient water desalination, *Chem. Eng. J.* 2021, 406, 126827.
